# Supplementary figures and images for: Male Circumcision Significantly Reduces Prevalence and Load of Genital Anaerobic Bacteria
Source: PubMed Central journal article supplement — mBio. 2013 Apr 16;4(2):e00076-13. doi: 10.1128/mBio.00076-13 (PMC3634604; doi:10.1128/mbio.00076-13), 2013-04-16

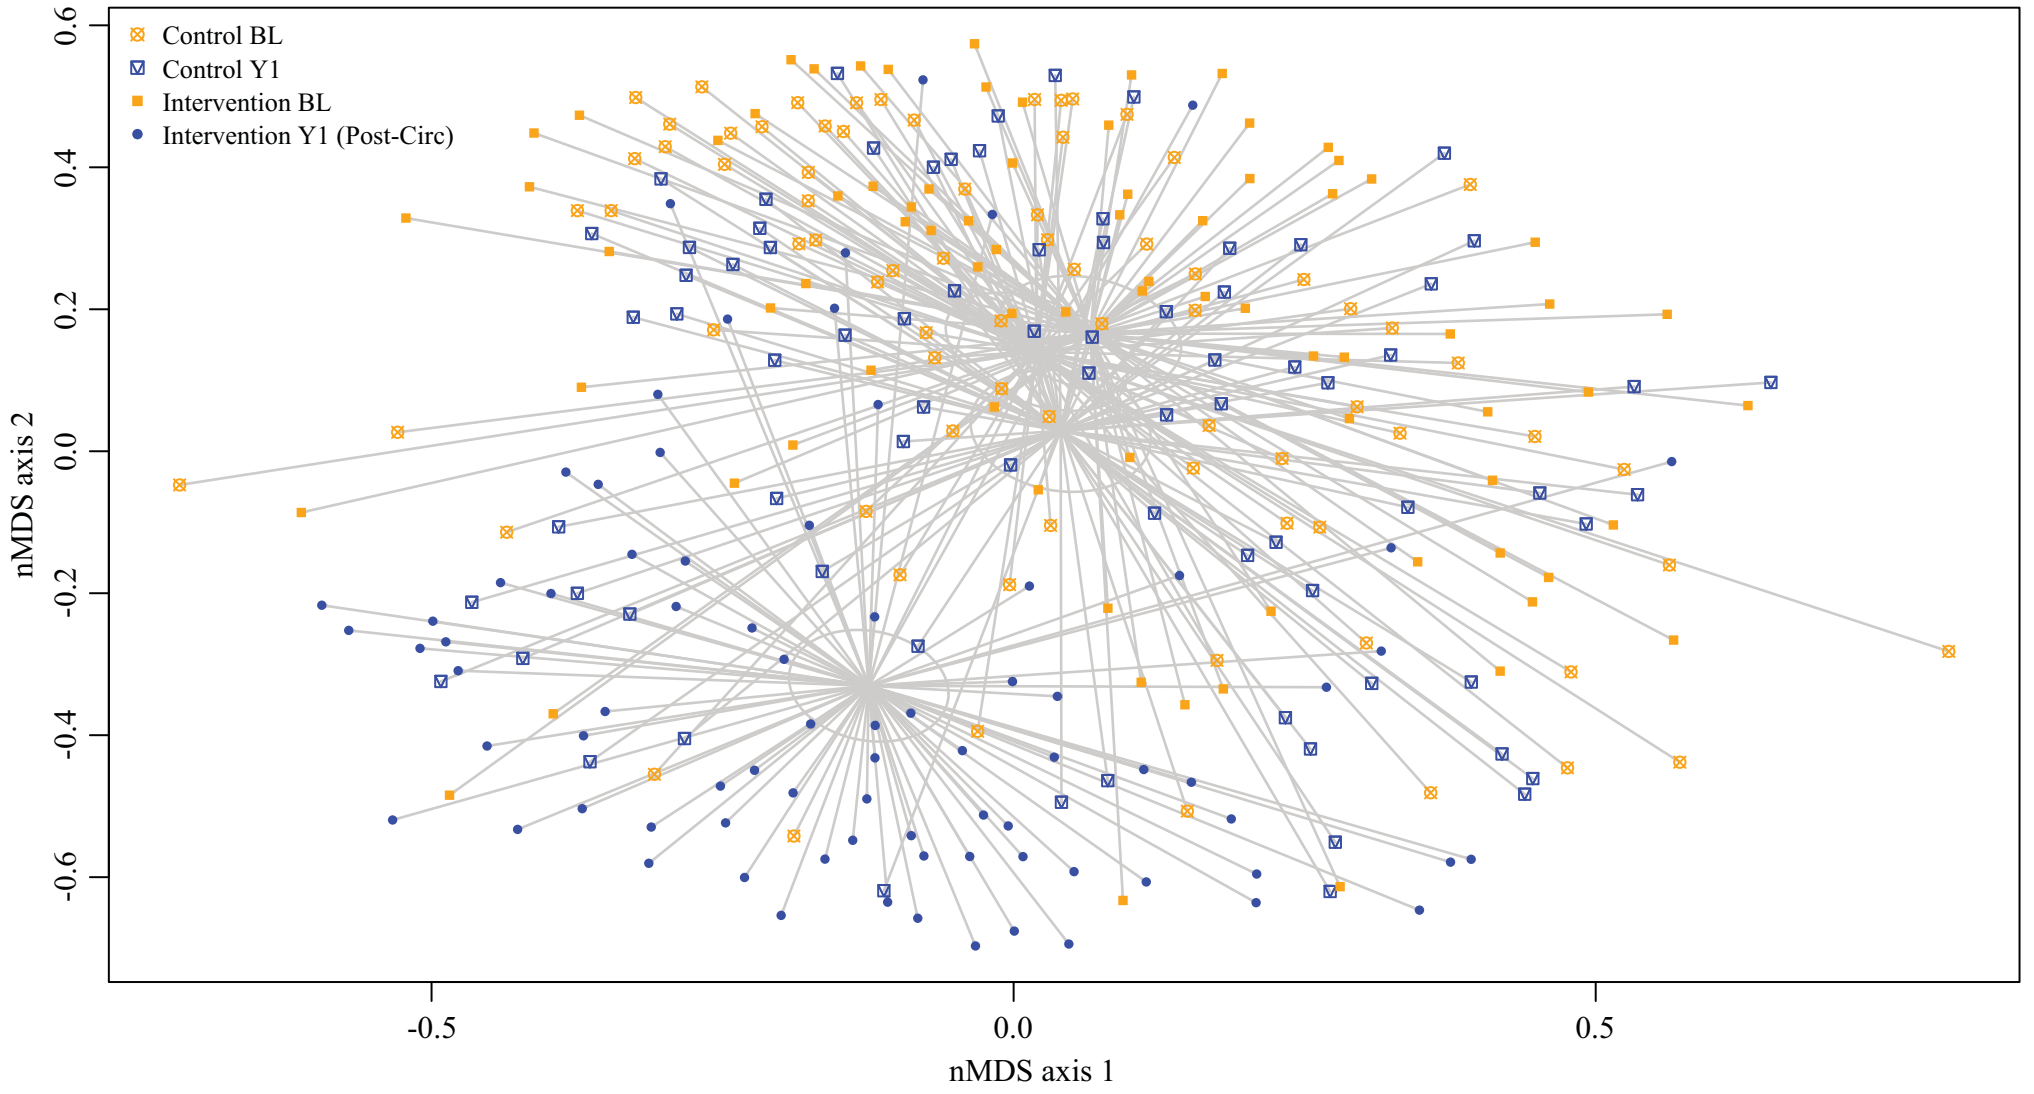

Supplement: mbo002131493sf01.pdf [file mbo002131493sf01.pdf]
